# Supplementary material for: Multi-species analysis of inflammatory response elements reveals ancient and lineage-specific contributions of transposable elements to NF-kB binding
Source: HighWire-hosted journal article supplement (doi:10.1101/gr.280357.124), 2025-06-06
Supplement: Supplemental_Table_S2.docx [file Supplemental_Table_S2.docx]

| **Species** | **Genome version** | **# MER81** |
| --- | --- | --- |
| human | hg19 | 3668 |
| marmoset | calJac3 | 3148 |
| rhesus monkey | rheMac3 | 3497 |
| bushbaby | otoGar3 | 2604 |
| tarsier | tarSyr2 | 3357 |
| tree shrew | tupBel1 | 1628 |
| lemur | micMur1 | 2759 |
| mouse | mm10 | 505 |
| rat | rn5 | 498 |
| prairie vole | micOch1 | 516 |
| rabbit | oryCun2 | 1581 |
| bat | myoLuc2 | 2213 |
| megabat | pteVam1 | 2710 |
| hedgehog | eriEur2 | 534 |
| dog | canFam3 | 2891 |
| cat | felCat5 | 3124 |
| cow | bosTau7 | 2758 |
| pig | susScr3 | 2842 |
| alpaca | vicPac2 | 3116 |
| horse | equCab2 | 3895 |
| elephant | loxAfr3 | 3292 |
| armadillo | dasNov3 | 3156 |
| dolphin | turTru2 | 3403 |
| opossum | monDom5 | 0 |

**Supplemental Table S2.** MER81 annotations by RepeatMasker in 24 selected mammals. These mammals cover major modern lineages. The numbers of MER81 copies in each species (each specific genome build) were obtained from RepeatMasker annotations.
